# Supplementary material for: PPARα-Dependent Modulation by Metformin of the Expression of OCT-2 and MATE-1 in the Kidney of Mice
Source: MDPI journal article supplement (doi:10.3390/molecules25020392), 2020-01-17
Supplement: s1 [file s1]

## PPAR $\alpha$ -Dependent Modulation by Metformin of the Expression of OCT-2 and MATE-1 in the Kidney of Mice

Adriano Cleis Arruda <sup>1</sup>, Mauro Sérgio Perilhão <sup>1</sup>, Warley Almeida Santos <sup>1</sup>,  
Marcos Fernandes Gregnani <sup>1</sup>, Alexandre Budu <sup>1</sup>, José Cesar Rosa Neto <sup>2</sup>,  
Gabriel Rufino Estrela <sup>3</sup> and Ronaldo Carvalho Araujo <sup>4,\*</sup>

<sup>1</sup> Department of Biophysics, Federal University of São Paulo, 04039032 São Paulo, Brazil; adriano.arruda@unifesp.br (A.C.A.); m.perilhao@unifesp.br (M.S.P.); wharleysan@gmail.com (W.A.S.); mgregnani@hotmail.com (M.F.G.); alexandre.budu@unifesp.br (A.B)

<sup>2</sup> Department Cell Biology and Development, Institute of Biomedical Sciences, University of São Paulo, 05508000, São Paulo, Brazil; josecesar23@hotmail.com

<sup>3</sup> Department of Clinical and Experimental Oncology, Discipline of Hematology and Haematotherapy, Federal University of São Paulo, 04037002 São Paulo, Brazil; g.estrela@unifesp.br

<sup>4</sup> Department of Biophysics, Federal University of São Paulo, 04039032 São Paulo, Brazil; araujo.ronaldo@unifesp.br

\*Correspondence: araujo.ronaldo@unifesp.br; Tel.: (+55-11-5576-4859)

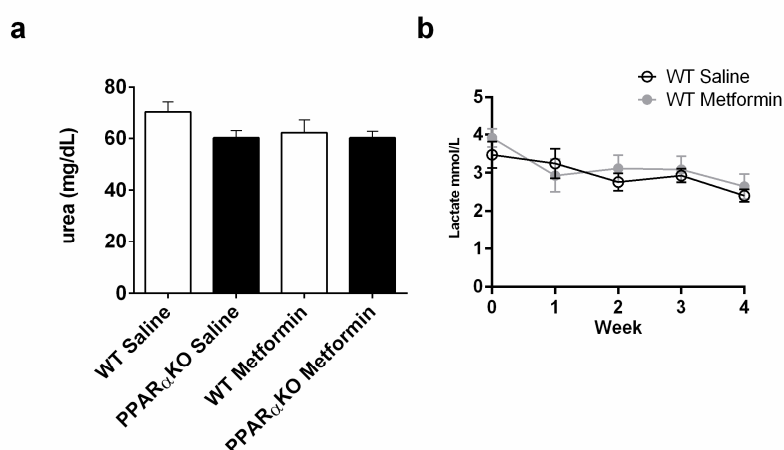

**Figure S1.** Measurement of plasma urea (a) in wild type (WT) and PPAR $\alpha$  knockout (PPAR $\alpha$ KO) mice and blood lactate (b) in wild type (WT) mice treated with 300 mg/kg of metformin once a day for 30 days. Data was compared by Two-Way ANOVA and Tukey multiple comparisons test (a), or unpaired, nonparametric Mann-Whitney test (b). Data is presented as Mean  $\pm$  S.E.M.
